# Supplementary material for: ATP dynamics as a predictor of future podocyte structure and function after acute ischemic kidney injury in female mice
Source: PubMed Central journal article supplement — Nat Commun. 2024 Nov 22;15:9977. doi: 10.1038/s41467-024-54222-0 (PMC11584722; doi:10.1038/s41467-024-54222-0), 2024-11-22
Supplement: 41467_2024_54222_MOESM2_ESM.pdf [file 41467_2024_54222_MOESM2_ESM.pdf]

## **Description of Additional Supplementary Files**

**File name: Supplementary Movie 1**

**Description:** Three-dimensional image of podocyte mitochondria after sham surgery\_No.1

**File name: Supplementary Movie 2**

**Description:** Three-dimensional image of podocyte mitochondria after sham surgery\_No.2

**File name: Supplementary Movie 3**

**Description:** Three-dimensional image of podocyte mitochondria after sham surgery\_No.3

**File name: Supplementary Movie 4**

**Description:** Three-dimensional image of podocyte mitochondria 30 minutes after 45-minutes IR\_No.1

**File name: Supplementary Movie 5**

**Description:** Three-dimensional image of podocyte mitochondria 30 minutes after 45-minutes IR\_No.2

**File name: Supplementary Movie 6**

**Description:** Three-dimensional image of podocyte mitochondria 30 minutes after 45-minutes IR\_No.3
